# Supplementary material
Source: PubMed Central journal article supplement (PMC3383611)
Supplement: NIHMS377331-supplement-01.pdf [file NIHMS377331-supplement-01.pdf]

**Supplement Table 1. Odds ratios<sup>†</sup> with 95% confidence intervals for individual stroke symptoms associated with older age, women sex and black race and p-values<sup>‡</sup> for differences in the association of these factors with stroke symptoms**

| Demographic Factors            | Individual stroke symptom      | OR (95% CI)        | Individual Stroke Symptoms, P-values |                     |                               |                         |                            |                     |
|--------------------------------|--------------------------------|--------------------|--------------------------------------|---------------------|-------------------------------|-------------------------|----------------------------|---------------------|
|                                |                                |                    | Loss of ability to Communicate       | Unilateral numbness | Loss of ability to understand | Painless loss of vision | Loss of one half of vision | Unilateral weakness |
| <b>Age, per 10 years older</b> | Loss of ability to Communicate | 0.99 (0.93 – 1.07) |                                      | <.001               | 0.003                         | 0.535                   | 0.104                      | <.001               |
|                                | Unilateral numbness            | 0.83 (0.79 – 0.87) | <.001                                |                     | <.001                         | <.001                   | <.001                      | 0.349               |
|                                | Loss of ability to understand  | 1.16 (1.07 – 1.25) | 0.003                                | <.001               |                               | 0.035                   | 0.301                      | <.001               |
|                                | Painless loss of vision        | 1.03 (0.97 – 1.10) | 0.535                                | <.001               | 0.035                         |                         | 0.177                      | <.001               |
|                                | Loss of one half of vision     | 1.09 (1.01 – 1.18) | 0.104                                | <.001               | 0.301                         | 0.177                   |                            | <.001               |
|                                | Unilateral weakness            | 0.85 (0.80 – 0.90) | <.001                                | 0.349               | <.0001                        | <.001                   | <.0001                     |                     |
| <b>Sex (Women vs Men)</b>      | Loss of ability to Communicate | 1.36 (1.19 – 1.56) |                                      | 0.007               | <.001                         | 0.001                   | 0.012                      | 0.006               |
|                                | Unilateral numbness            | 1.11 (1.02 – 1.22) | 0.007                                |                     | 0.111                         | 0.280                   | 0.648                      | 0.785               |
|                                | Loss of ability to understand  | 0.98 (0.84 – 1.14) | <.001                                | 0.111               |                               | 0.531                   | 0.344                      | 0.168               |
|                                | Painless loss of vision        | 1.03 (0.92 – 1.16) | 0.001                                | 0.280               | 0.531                         |                         | 0.608                      | 0.408               |
|                                | Loss of one half of vision     | 1.07 (0.93 – 1.24) | 0.012                                | 0.648               | 0.344                         | 0.608                   |                            | 0.786               |
|                                | Unilateral weakness            | 1.09 (0.98 – 1.22) | 0.006                                | 0.785               | 0.168                         | 0.408                   | 0.786                      |                     |
| <b>Race (Black vs White)</b>   | Loss of ability to Communicate | 1.33 (1.16 – 1.51) |                                      | <.001               | <.001                         | 0.160                   | 0.518                      | <.001               |
|                                | Unilateral numbness            | 1.97 (1.81 – 2.16) | <.001                                |                     | 0.497                         | <.001                   | <.001                      | 0.864               |
|                                | Loss of ability to understand  | 1.87 (1.61 – 2.18) | <.001                                | 0.4965              |                               | <.001                   | <.001                      | 0.581               |
|                                | Painless loss of vision        | 1.18 (1.05 – 1.33) | 0.160                                | <.0001              | <.001                         |                         | 0.434                      | <.001               |
|                                | Loss of one half of vision     | 1.25 (1.08 – 1.44) | 0.518                                | <.0001              | <.001                         | 0.434                   |                            | <.001               |
|                                | Unilateral weakness            | 1.96 (1.76 – 2.18) | <.001                                | 0.864               | 0.581                         | <.001                   | <.001                      |                     |

OR, odds ratio; CI, confidence intervals

† Odds ratios include adjustment for region of residence and the other demographic factors.

‡ P-values represent the pair-wise comparison for the association between a demographic factor and two individual stroke symptoms.

**Supplement Table 2. Odds ratios<sup>†</sup> with 95% confidence intervals and p-values<sup>‡</sup> for individual stroke symptoms associated with cigarette smoking, hypertension and diabetes**

| Modifiable risk factors            | Individual stroke symptoms     | OR (95% CI)           | Individual stroke symptoms, P-values |                     |                               |                         |                            |                     |
|------------------------------------|--------------------------------|-----------------------|--------------------------------------|---------------------|-------------------------------|-------------------------|----------------------------|---------------------|
|                                    |                                |                       | Loss of ability to Communicate       | Unilateral numbness | Loss of ability to understand | Painless loss of vision | Loss of one half of vision | Unilateral weakness |
| <b>Current Smoking (Yes vs No)</b> | Loss of ability to Communicate | 1.47<br>(1.24 – 1.74) |                                      | 0.563               | 0.528                         | 0.876                   | 0.242                      | 0.289               |
|                                    | Unilateral numbness            | 1.55<br>(1.38 – 1.72) | 0.563                                |                     | 0.941                         | 0.429                   | 0.070                      | 0.456               |
|                                    | Loss of ability to understand  | 1.54<br>(1.27 – 1.87) | 0.528                                | 0.941               |                               | 0.508                   | 0.121                      | 0.706               |
|                                    | Painless loss of vision        | 1.44<br>(1.24 – 1.68) | 0.876                                | 0.429               | 0.508                         |                         | 0.206                      | 0.201               |
|                                    | Loss of one half of vision     | 1.27<br>(1.05 – 1.54) | 0.242                                | 0.070               | 0.121                         | 0.206                   |                            | 0.027               |
|                                    | Unilateral weakness            | 1.62<br>(1.42 – 1.84) | 0.289                                | 0.456               | 0.706                         | 0.201                   | 0.027                      |                     |
| <b>Hypertension (Yes vs No)</b>    | Loss of ability to Communicate | 1.26<br>(1.10 – 1.45) |                                      | 0.610               | 0.714                         | 0.676                   | 0.642                      | 0.030               |
|                                    | Unilateral numbness            | 1.32<br>(1.20 – 1.45) | 0.610                                |                     | 0.930                         | 0.293                   | 0.322                      | 0.016               |
|                                    | Loss of ability to understand  | 1.29<br>(1.09 – 1.52) | 0.714                                | 0.930               |                               | 0.477                   | 0.467                      | 0.113               |
|                                    | Painless loss of vision        | 1.21<br>(1.07 – 1.37) | 0.676                                | 0.293               | 0.477                         |                         | 0.909                      | 0.006               |
|                                    | Loss of one half of vision     | 1.20<br>(1.03 – 1.40) | 0.642                                | 0.322               | 0.464                         | 0.909                   |                            | 0.014               |
|                                    | Unilateral weakness            | 1.52<br>(1.35 – 1.70) | 0.030                                | 0.016               | 0.113                         | 0.006                   | 0.014                      |                     |
| <b>Diabetes (Yes vs No)</b>        | Loss of ability to Communicate | 1.31<br>(1.13 – 1.53) |                                      | 0.501               | 0.019                         | 0.020                   | 0.010                      | 0.200               |
|                                    | Unilateral numbness            | 1.39<br>(1.26 – 1.54) | 0.501                                |                     | 0.101                         | 0.034                   | 0.020                      | 0.357               |
|                                    | Loss of ability to understand  | 1.61<br>(1.36 – 1.91) | 0.019                                | 0.101               |                               | 0.889                   | 0.593                      | 0.314               |
|                                    | Painless loss of vision        | 1.64<br>(1.44 – 1.88) | 0.020                                | 0.034               | 0.889                         |                         | 0.582                      | 0.181               |
|                                    | Loss of one half of vision     | 1.71<br>(1.46 – 2.01) | 0.010                                | 0.020               | 0.593                         | 0.582                   |                            | 0.103               |
|                                    | Unilateral weakness            | 1.48<br>(1.31 – 1.66) | 0.200                                | 0.357               | 0.314                         | 0.181                   | 0.103                      |                     |

OR, odds ratio; CI, confidence intervals

<sup>†</sup> Odds ratios include adjustment for age, race, sex and region of residence.

<sup>‡</sup> P-values represent the pair-wise comparison for the association between a modifiable risk factor and two individual stroke symptoms.

**Appendix: Questionnaire for Verifying Stroke-Free Status – Individual stroke symptoms**

1. Have you ever had sudden painless weakness on one side of your body?
2. Have you ever had sudden numbness or a dead feeling on one side of your body?
3. Have you ever had sudden painless loss of vision in one or both eyes?
4. Have you ever suddenly lost one half of your vision?
5. Have you ever suddenly lost the ability to understand what people were saying?
6. Have you suddenly lost the ability to express yourself verbally or in writing?

See reference 13.
